# Supplementary material
Source: Springer Nature journal article supplement (https://www.springermedizin.de/resource/supplementary/12874_2006_171_MOESM2_ESM.pdf/9433918)

|           | 1                  | 2                  | 3                  | 4                  | 5.1                  | 5.2                | 5.3                  | 5.4                  | Journal     |
|-----------|--------------------|--------------------|--------------------|--------------------|----------------------|--------------------|----------------------|----------------------|-------------|
| CNAAB3005 | Done appropriately | Done appropriately | Done appropriately | Done appropriately | Done inappropriately | Not done           | Done inappropriately | Done inappropriately | JAMA        |
| NEFA      | Not done           | Done appropriately | Done appropriately | Not done           | Done inappropriately | Not done           | Done inappropriately | Done inappropriately | NEJM        |
| BEST      | Not done           | Done appropriately | Done appropriately | Not done           | Done appropriately   | Not done           | Not done             | Done inappropriately | AIDS        |
| 2NN       | Not done           | Done appropriately | Not done           | Done appropriately | Not done             | Not done           | Done inappropriately | Done inappropriately | Lancet      |
| 903       | Done appropriately | Done appropriately | Not done           | Done appropriately | Not done             | Done appropriately | Done inappropriately | Done inappropriately | JAMA        |
| SOLO      | Not done           | Done appropriately | Done appropriately | Done appropriately | Done appropriately   | Not done           | Done appropriately   | Done inappropriately | AIDS        |
| FTC-303   | Not done           | Done appropriately | Not done           | Not done           | Not done             | Not done           | Done appropriately   | Done inappropriately | AIDS        |
| EPV20001  | Not done           | Done appropriately | Done appropriately | Done appropriately | Done appropriately   | Done appropriately | Done appropriately   | Done appropriately   | CID         |
| ALIZE     | Not done           | Done appropriately | Done appropriately | Done appropriately | Done appropriately   | Not done           | Done appropriately   | Done inappropriately | JID         |
| CNA30024  | Done appropriately | Done appropriately | Not done           | Done appropriately | Not done             | Not done           | Done appropriately   | Done appropriately   | CID         |
| BMS-2004  | Not done           | Done appropriately | Done appropriately | Done appropriately | Done appropriately   | Not done           | Done inappropriately | Done inappropriately | JAIDS       |
| ESS40013  | Not done           | Done appropriately | Not done           | Done appropriately | Not done             | Not done           | Done inappropriately | Done inappropriately | JAIDS       |
| SEAL      | Not done           | Done appropriately | Done appropriately | Done appropriately | Done appropriately   | Not done           | Done appropriately   | Done appropriately   | JAIDS       |
| BMS-045   | Not done           | Done appropriately | Not done           | Not done           | Not done             | Not done           | Done appropriately   | Done inappropriately | AIDS        |
| CNA30021  | Done appropriately | Done appropriately | Not done           | Not done           | Not done             | Not done           | Done appropriately   | Done appropriately   | CID         |
| CONTEXT   | Not done           | Done appropriately | Done appropriately | Done appropriately | Not done             | Not done           | Done appropriately   | Done appropriately   | Unpublished |
| SHAART    | Not done           | Done appropriately | Done appropriately | Done appropriately | Done inappropriately | Done appropriately | Done inappropriately | Done inappropriately | JAIDS       |
| 934       | Not done           | Done appropriately | Not done           | Done appropriately | Not done             | Not done           | Done appropriately   | Done appropriately   | NEJM        |

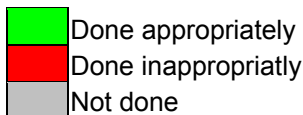

Supplement: MOESM2 [file 9433918]
